# Supplementary material for: Neighborhood Material Deprivation Is Associated with Childhood Asthma Development: Analysis of Prospective Administrative Data
Source: Hindawi journal article supplement (doi:10.1155/2019/6808206), 2019-05-19
Supplement: f1 [file 6808206.f1.pdf]

322 **Supplemental Table 1. OHIP, ICD-9 and ICD-10 diagnostic codes**

| Condition               | OHIP | ICD-9                  | ICD-10                 |
|-------------------------|------|------------------------|------------------------|
| Asthma                  | 493  | 493                    | J45                    |
| Preterm delivery        | 765  | 765.00 to 765.19       | P070, P071, P072, P073 |
| Obesity                 | 278  | 278.00                 | E660, E668, E669       |
| Other atopic conditions |      |                        |                        |
| Allergic rhinitis       | 477  | 477.00, 477.08, 477.09 | J301, J302, J303, J304 |
| Atopic dermatitis       | 691  | 691.80                 | L208, L209             |
| Food allergy            | 995  | 995.00                 | T7800 to T7809         |

323

324

325 **Supplemental Table 2. Associations between incident asthma and birth neighborhood**  
 326 **deprivation among subgroups of children living in the Greater Toronto Area (GTA)**

|                   | Children born in an Ontario hospital | Children living continuously in the GTA |
|-------------------|--------------------------------------|-----------------------------------------|
|                   | Hazard Ratio (95% CI) <sup>a</sup>   | Hazard Ratio (95% CI) <sup>a</sup>      |
| High deprivation  | 1.18 (1.15, 1.20)                    | 1.11 (1.08, 1.13)                       |
| Male sex          | 1.44 (1.42, 1.47)                    | 1.45 (1.42, 1.49)                       |
| Prematurity       | 1.32 (1.29, 1.36)                    | 1.59 (1.54, 1.65)                       |
| Obesity           | 1.35 (1.31, 1.39)                    | 1.49 (1.43, 1.54)                       |
| Atopic conditions | 1.98 (1.92, 2.03)                    | 2.87 (2.79, 2.96)                       |

327 <sup>a</sup> Adjusted hazard ratio of incident asthma (95% confidence interval), also adjusted for year of  
 328 birth. Results of multivariable Cox proportional hazards models  
 329
